# Supplementary material for: Adverse events experienced with intrahospital transfer of critically ill patients: A national survey
Source: PubMed Central journal article supplement — Medicine (Baltimore). 2021 May 7;100(18):e25810. doi: 10.1097/MD.0000000000025810 (PMC8104182; doi:10.1097/md.0000000000025810), 2021-05-07
Supplement: medi-100-e25810-s001.pdf [file medi-100-e25810-s001.pdf]

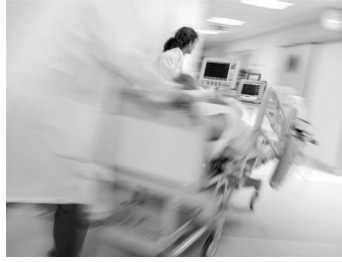

## ICU Transfers

### A Survey

**We are conducting a quick Survey among Healthcare Workers (HCWs) (i.e. physicians, nurses, paramedics, RTs...) who are involved in the ICU transfers in the Kingdom.**

**We invite you to take 3-5 minutes; to share your experience.**

#### **About this Survey:**

- 1. Purpose is to assess current practice of HCWs in ICUs transfer (to and from ICU).**
- 2. Please answer according to your actual practice.**
- 3. We will ensure your confidentiality.**
- 4. Optional: you may provide your email: to get feedback about results and enroll in our Lucky Draw for Jarir Bookstore Coupons!**

**Thanks for your participation!!**

**Hani Temsah  
PICU - KSUMC**

**\* 1. Consent to participate in this Survey:**

- I am a Healthcare Worker involved in ICU patients transfer AND Accept to participate in this Survey
- I do NOT accept to participate

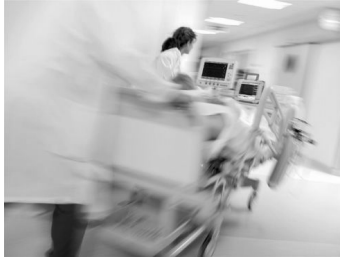

## ICU Transfers

### General Questions:

\* 2. You are:

- |                                                                        |                                             |
|------------------------------------------------------------------------|---------------------------------------------|
| <input type="radio"/> Consultant                                       | <input type="radio"/> Nurse                 |
| <input type="radio"/> Assistant Consultant / Senior Registrar / Fellow | <input type="radio"/> Paramedic             |
| <input type="radio"/> Registrar / R3 / R4                              | <input type="radio"/> Respiratory Therapist |
| <input type="radio"/> Resident / R1 / R2                               | <input type="radio"/> Intern                |
| <input type="radio"/> Other (please specify)                           |                                             |

\* 3. Years of experience in your current position:

- 2 years or less
- 3-5 years
- 6-10 years
- more than 10 years

\* 4. Your main hospital coverage:

- |                                                  |                                    |
|--------------------------------------------------|------------------------------------|
| <input type="radio"/> General Wards - Adults     | <input type="radio"/> Adult ER     |
| <input type="radio"/> General Wards - Pediatrics | <input type="radio"/> Pediatric ER |
| <input type="radio"/> NICU                       | <input type="radio"/> Ambulance    |
| <input type="radio"/> PICU                       | <input type="radio"/> OR           |
| <input type="radio"/> SICU                       | <input type="radio"/> All          |
| <input type="radio"/> Adult ICU                  |                                    |
| <input type="radio"/> Other (please specify)     |                                    |

\* 5. What is your gender?

- Female
- Male



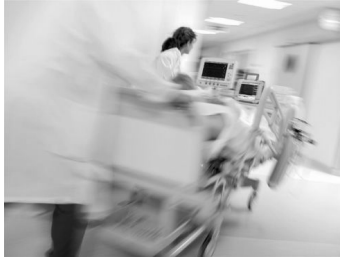

## ICU Transfers

\* 6. During the last 2 years: were you involved in transferring any critically ill patient to ICU?

Yes

No



## ICU Transfers

### Transfer of critically ill patients to ICU:

\* 7. Your approximate number of transfers to ICU (in a month of clinical duty)

- 0  
 1-4  
 5-8  
 9-12  
 > 12

\* 8. On a scale from 1 (totally disagree) to 5 (totally agree), please rate each statement from your own experience:

|                                                                                                            | 1 Totally Disagree    | 2                     | 3                     | 4                     | 5 Totally Agree       | Not applicable / I do not know |
|------------------------------------------------------------------------------------------------------------|-----------------------|-----------------------|-----------------------|-----------------------|-----------------------|--------------------------------|
| My Hospital's actual process of transfer of critically ill patients to ICU is adequate for patient's needs | <input type="radio"/>          |
| My hospital has clear written guidelines for admission of patients to ICU                                  | <input type="radio"/>          |
| Unexpected surprises or events are common during our patients' transfer to ICU                             | <input type="radio"/>          |
| Unexpected surprises or events are common just after our patients arrival to ICU                           | <input type="radio"/>          |
| I am satisfied with our process of transfer of critically ill patients to the ICU                          | <input type="radio"/>          |

9. What adverse events did you encounter before in your critically ill patients who were just transferred to ICU?

(Please choose all that apply)

- medication errors
- self extubation / loss of advanced airway
- aspiration
- decreased level of consciousness
- loss of vascular access
- deterioration in respiratory status (as compared to pre-transfer)
- deterioration in hemodynamic status (as compared to pre-transfer)
- missing clinical information (e.g. missing Lab or management plan)
- Other (please specify)



## ICU Transfers

\* 10. During the last 2 years: were you involved in transferring out stable patient from ICU patient to the Ward?

- Yes
- No

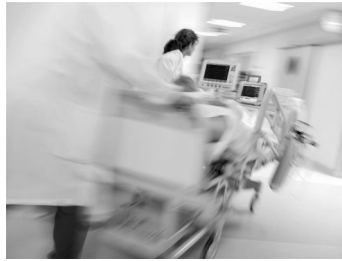

## ICU Transfers

Transfer out from ICU to Ward for stable patients:

\* 11. Your approximate number of transfers out from ICU (in a month of clinical duty)

- 0
- 1-4
- 5-8
- 9-12
- > 12

\* 12. On a scale from 1 (totally disagree) to 5 (totally agree), please rate your own experience with each statement:

|                                                                                                              | 1 Totally Disagree    | 2                     | 3                     | 4                     | 5 Totally Agree       | Not applicable / I do not know |
|--------------------------------------------------------------------------------------------------------------|-----------------------|-----------------------|-----------------------|-----------------------|-----------------------|--------------------------------|
| My Hospital's current actual process of <u>transfer out from ICU to Ward</u> is adequate for patient's needs | <input type="radio"/>          |
| My hospital has clear written guidelines for transfer out of patients from ICU to Ward                       | <input type="radio"/>          |
| Unexpected surprises or events are common during the transfer out                                            | <input type="radio"/>          |
| Unexpected surprises or events are common during first 24 hours post transfer out from ICU to ward           | <input type="radio"/>          |
| I am satisfied with the process of transfer out form ICU to the Ward                                         | <input type="radio"/>          |



13. What adverse events did you encounter before in patients transferred from ICU to Ward?  
(Adverse events experienced in a recent (24-48 hour) transfer from the ICU)

(Please choose all that apply)

- medication errors
- missing clinical information (e.g. missing management plan)
- aspiration
- decreased level of consciousness requiring intervention
- seizures
- worsening respiratory status
- worsening hemodynamic status / shock
- Other (please specify)



## ICU Transfers

Thank you!

\* 14. What communication tools you use for ICU transfers?

(Please choose all that apply)

- Verbal (from colleague to colleague)
- Written in Electronic Health Record (EHR)
- Written on paper
- Other (please specify)

\* 15. Regarding SBAR (Situation, Background, Assessment and Recommendation) technique:

- I am not aware of this technique
- I know SBAR, but we do not use it in our ICU transfers
- SBAR is used for some ICU transfers
- SBAR is used for all our ICU transfers

\* 16. Will this Survey make you more interested to focus on ICU Transfers in the future?

- Yes
- No

\* 17. Your main Hospital:

Hospital Level

Your Healthcare  
Facility Level of Care  
and Location:

City (please specify)

18. Optional: provide your contact information (email or mobile) if you want to be get email answer updates and/or to be included in our Lucky Draw for Jarir Coupons:
